# Supplementary material for: Psilocybin Therapy for Clinicians With Symptoms of Depression From Frontline Care During the COVID-19 Pandemic: A Randomized Clinical Trial
Source: PubMed Central journal article supplement (PMC11621983; doi:10.1001/jamanetworkopen.2024.49026), 2024-12-05

## Supplemental Online Content

Back AL, Freeman-Young TK, Morgan L, et al. Psilocybin therapy for clinicians with symptoms of depression from frontline care during the COVID-19 pandemic: a randomized clinical trial. *JAMA Netw Open*. 2024;7(12):e2449026.  
doi:10.1001/jamanetworkopen.2024.49026

**eTable.** Functional Unblinding Questions

**eFigure.** Study Flow Diagram

This supplemental material has been provided by the authors to give readers additional information about their work.

**eTable. Functional Unblinding Questions**

"Which treatment do you believe you received: the psilocybin or the niacin?"  
(just after capsule was swallowed)

| <b>Group</b>      | <b>"psilocybin"</b> | <b>"niacin"</b> | <b>"don't know"</b> |
|-------------------|---------------------|-----------------|---------------------|
| <b>Psilocybin</b> | 0                   | 0               | 15 (100%)           |
| <b>Placebo</b>    | 0                   | 0               | 15 (100%)           |

"Which treatment do you believe you received: the active drug or the placebo?"  
(asked just before discharge from the psilocybin or placebo session)

| <b>Group</b>      | <b>"psilocybin"</b> | <b>"niacin"</b> | <b>"don't know"</b> | <b>Correct at unblinding</b> |
|-------------------|---------------------|-----------------|---------------------|------------------------------|
| <b>Psilocybin</b> | 0                   | 0               | 15 (100%)           | 15 (100%)                    |
| <b>Placebo</b>    | 0                   | 0               | 15 (100%)           | 15 (100%)                    |

**eFigure.** Study Flow Diagram

Figure legend. The days are numbered using Day 0 as the day of the psilocybin or niacin session. Prep = Preparation session. Integ = Integration session. Baseline measures were completed just before Prep 1.

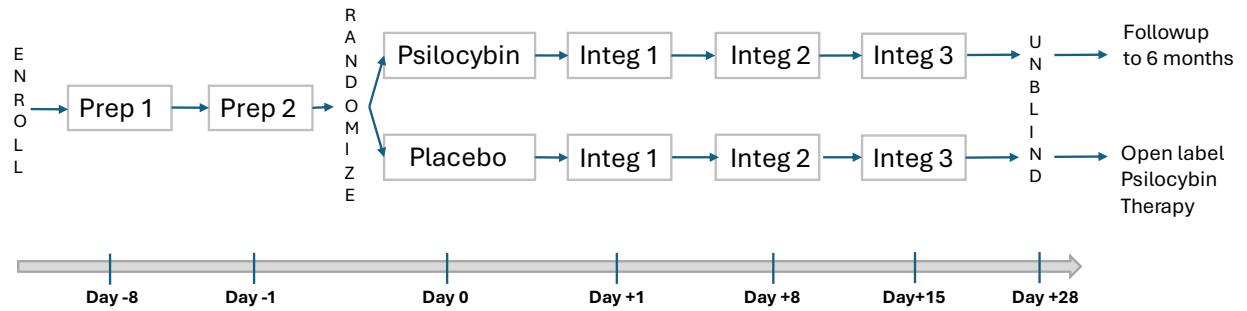

Supplement: jamanetwopen-e2449026-s002.pdf [file jamanetwopen-e2449026-s002.pdf]
