# Supplementary material for: Psilocybin Therapy for Clinicians With Symptoms of Depression From Frontline Care During the COVID-19 Pandemic: A Randomized Clinical Trial
Source: PubMed Central journal article supplement (PMC11621983; doi:10.1001/jamanetworkopen.2024.49026), 2024-12-05
Supplement: jamanetwopen-e2449026-s003.pdf [file jamanetwopen-e2449026-s003.pdf]

## Data Sharing Statement

Back. Psilocybin Therapy for Clinicians With Symptoms of Depression From Frontline Care During the COVID-19 Pandemic. *JAMA Netw Open*. Published December 05, 2024.

doi:10.1001/jamanetworkopen.2024.49026

### Data

**Additional Information:** NCT05163496

**Data available:** Yes

**Data types:** Deidentified participant data

**How to access data:** [tonyback@uw.edu](mailto:tonyback@uw.edu)

**When available:** beginning date: 01-01-2025

### Supporting Documents

**Document types:** None

### Additional Information

**Who can access the data:** Researchers whose proposed use of the data has been approved

**Types of analyses:** For a specified purpose

**Mechanisms of data availability:** After approval of a proposal

**Any additional restrictions:** None
